# Supplementary material for: Manganese transport is essential for N2‐fixation by Rhizobium leguminosarum in bacteroids from galegoid but not phaseoloid nodules
Source: PubMed Central journal article supplement (PMC5575495; doi:10.1111/1462-2920.13773), 2017-05-30

### a. GUS activity for *sitA-gusA*

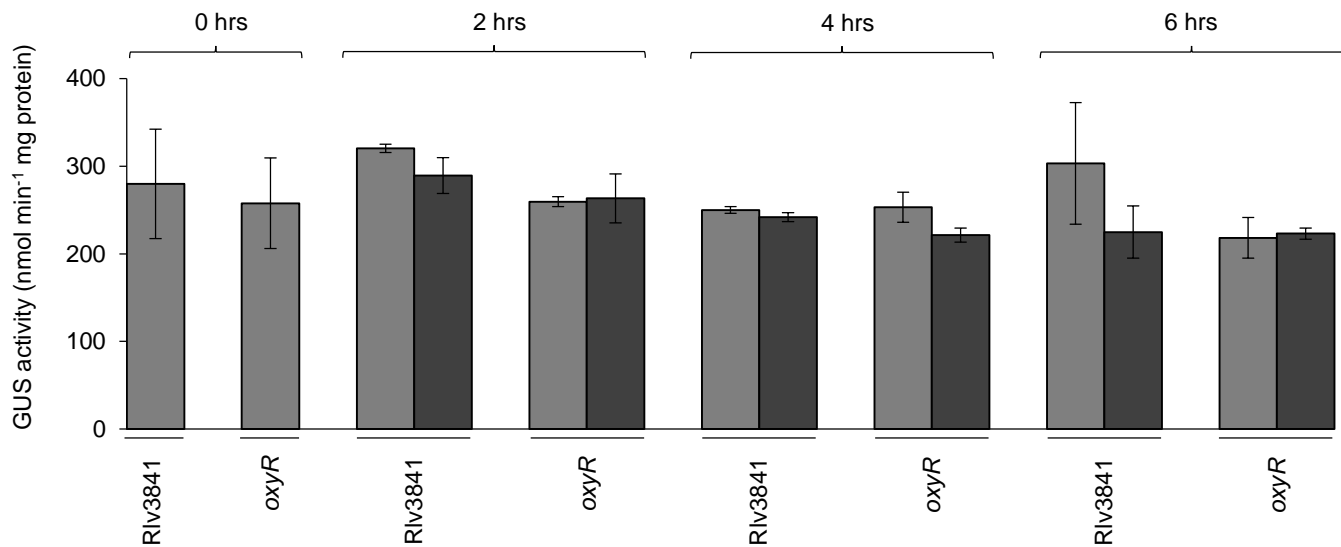

### b. GUS activity for *mntH-gusA*

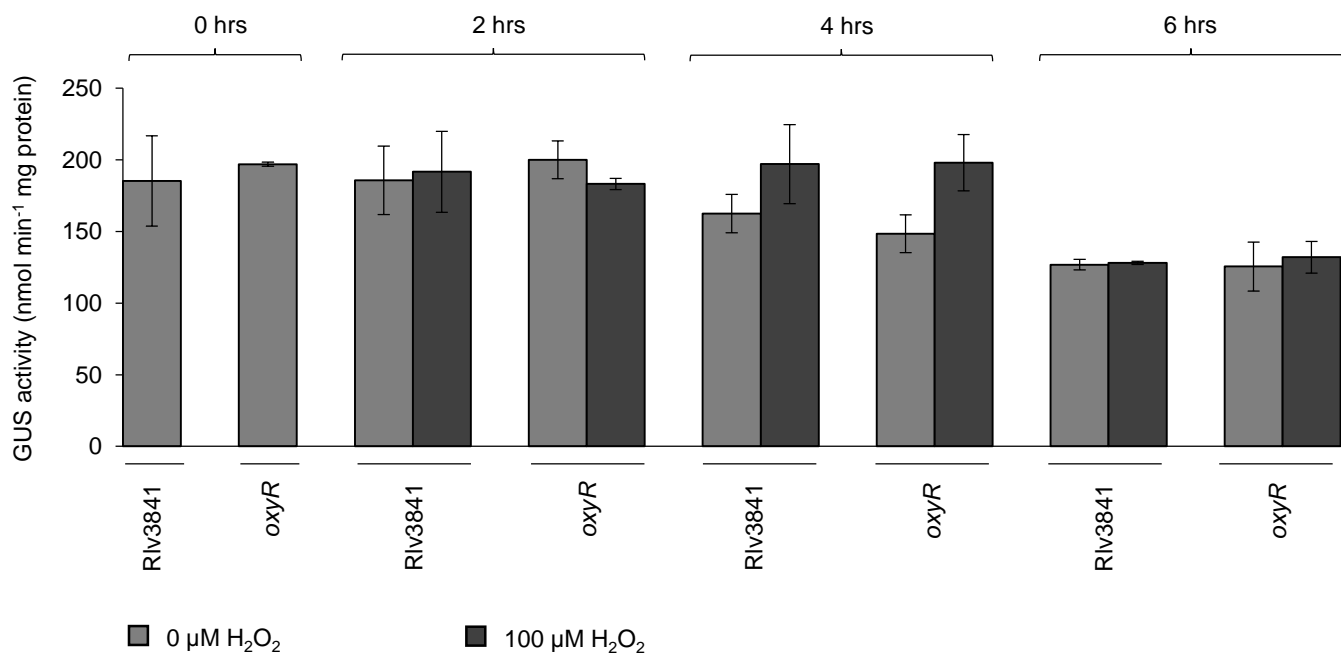

Supplement: EMI-19-2715-s002.pdf [file EMI-19-2715-s002.pdf]
